# Supplementary material for: A novel triphenylacrylonitrile based AIEgen for high contrast mechanchromism and bicolor electroluminescence
Source: Royal Society of Chemistry journal article supplement (doi:10.1039/c7ra10174k), 2018-01-01
Supplement: c7ra10174k1.pdf [file c7ra10174k1.pdf]

*Electronic Supporting Information*

# **A novel triphenylacrylonitrile based AIEgen for high contrast mechanchromism and bicolor electroluminescence**

Jiayou Hu<sup>a</sup>, Bingli Jiang<sup>b</sup>, Yongyang Gong<sup>a\*</sup>, Yuanli Liu<sup>a</sup>, Gang He<sup>a</sup>, Wang Zhang Yuan<sup>c\*</sup> and Chun Wei<sup>a\*</sup>

*<sup>a</sup>Key Laboratory of New Processing Technology for Non-ferrous Metals and Materials - Ministry of Education, GuangXi Key Laboratory of New Energy and Building Energy saving, College of Materials Science and Engineering, Guilin University of Technology, Guilin, 541004, China*

*<sup>b</sup> College of Pharmacy, Guilin Medical University , Guilin 541004, China*

*<sup>c</sup> School of Chemistry and Chemical Engineering, Shanghai Jiao Tong University, Shanghai 200240, China*

## **Table of Contents**

**Fig. S1** Synthetic routes of BP2TPAN.

**Fig. S2** Photographs of isolated BP2TPAN on TLC plate under 254 nm UV light irradiation after being developed in 1/1 petroleum ether-Chloroform mixture.

**Fig. S3**  $^1\text{H-NMR}$  spectrum of BP2TPAN in  $\text{THF-}d_8$ .

**Fig. S4** HRMS spectrum of BP2TPAN.

**Fig. S5** UV-Vis spectrum of BP2TPAN in THF.

**Fig.S6** Commission Internationale de L'Eclairage coordinates of the OLED doped and undoped devices of BPA2TPAN.

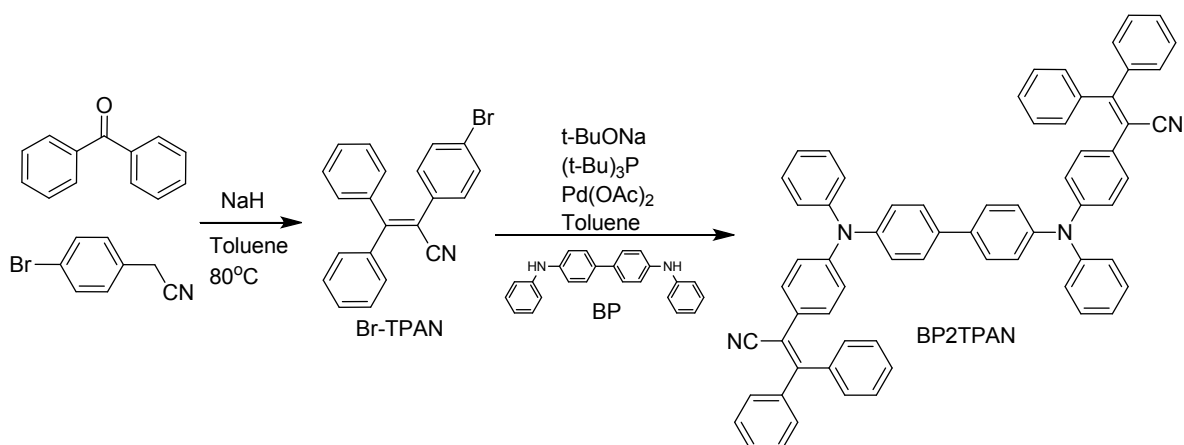

**Fig.S1** Synthetic routes of BP2TPAN.

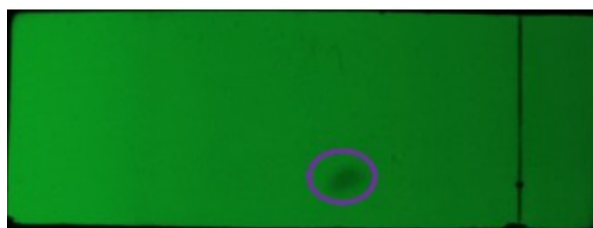

**Fig. S2** Photographs of isolated BP2TPAN on TLC plate under 254 nm UV light irradiation after being developed in 1/1 petroleum ether-Chloroform mixture.

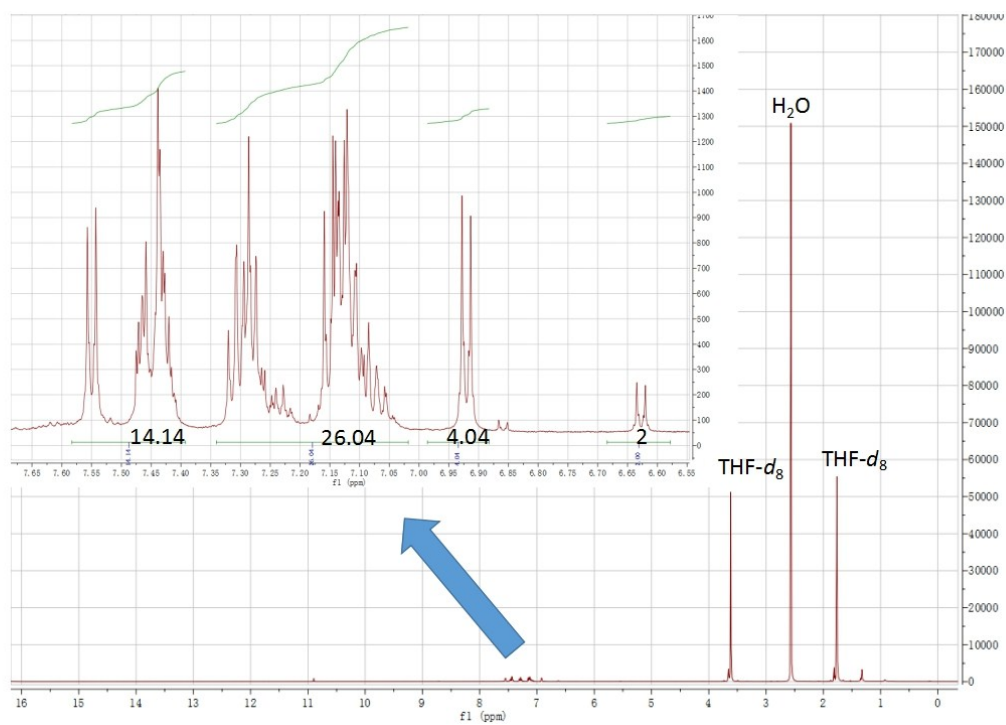

**Fig. S3** <sup>1</sup>H-NMR spectrum of BP2TPAN in THF-*d*<sub>8</sub>.

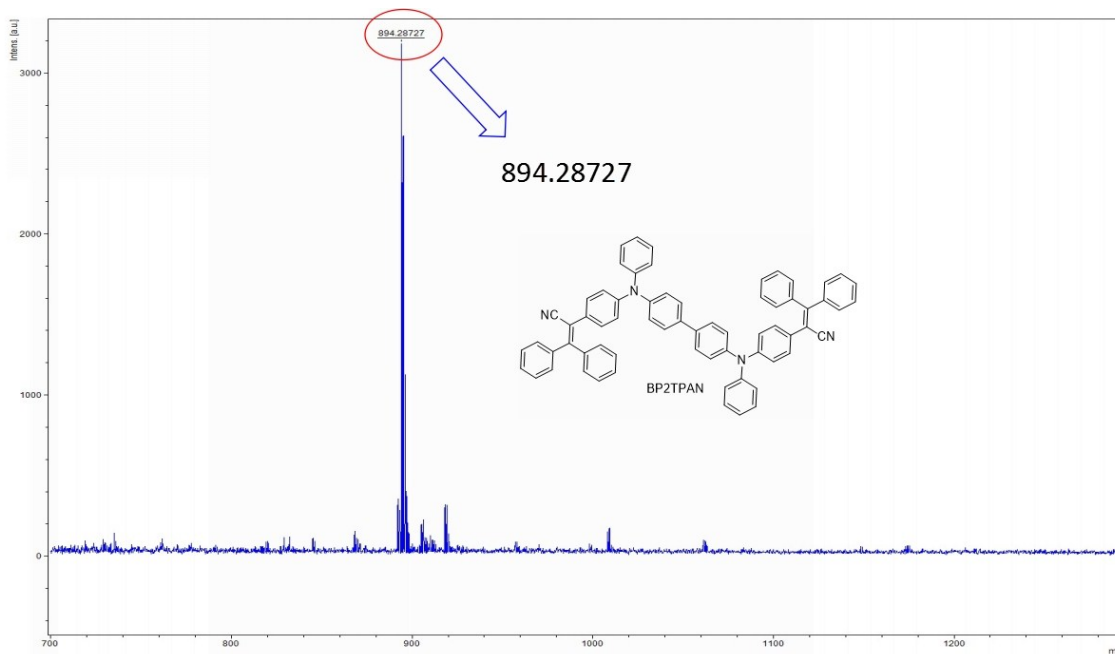

**Fig. S4** HRMS spectrum of BP2TPAN.

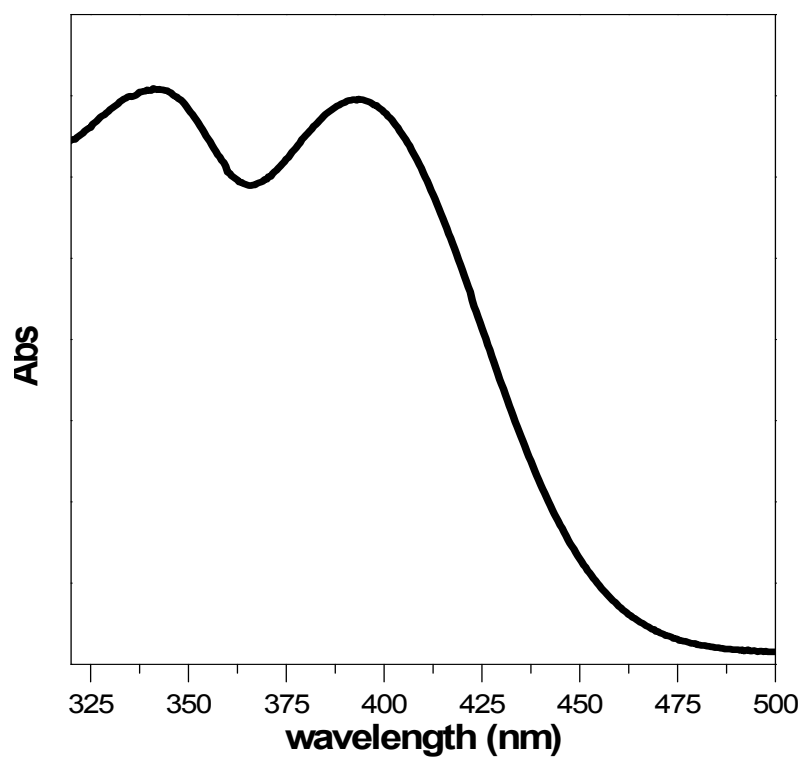

**Fig. S5** UV-Vis spectrum of BP2TPAN in THF. Concentration = 5  $\mu$ M.

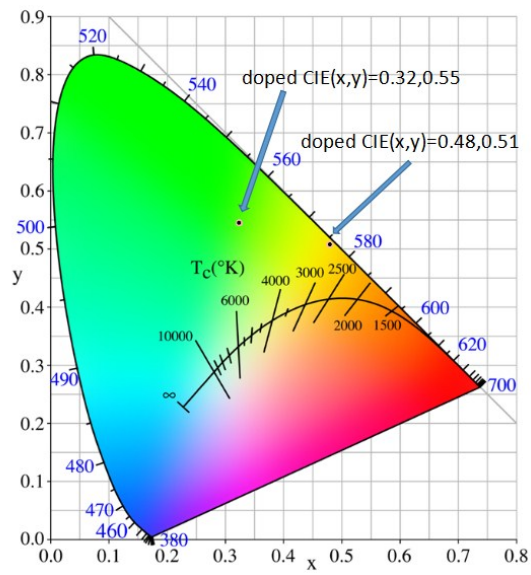

**Fig.S6** Commission Internationale de L'Eclairage coordinates of the OLED doped and nondoped devices of BPA2TPAN.
